# Supplementary material for: Detection, molecular typing and phylogenetic analysis of Leishmania isolated from cases of leishmaniasis among Syrian refugees in Lebanon
Source: PubMed Central journal article supplement — Parasite Epidemiol Control. 2016 Feb 27;1(2):159–68. doi: 10.1016/j.parepi.2016.02.002 (PMC5991828; doi:10.1016/j.parepi.2016.02.002), 2016-02-27
Supplement: mmc1.pdf [file mmc1.pdf]

|           | <b>Sample #</b> | <b>PI</b> | <b>Location</b> | <b>Date of lesion (months)</b> | <b>Gender</b> | <b>Age (years)</b> |
|-----------|-----------------|-----------|-----------------|--------------------------------|---------------|--------------------|
| <b>1</b>  | HH-13-10        | 3         | Beirut          | 4                              | F             | 6                  |
| <b>2</b>  | HH-13-11        | 2         | Beirut          | 4                              | M             | 21                 |
| <b>3</b>  | HH-13-12        | 3         | Beirut          | 4                              | F             | 31                 |
| <b>4</b>  | HH-13-14        | 5         | Beirut          | 5                              | F             | 25                 |
| <b>5</b>  | HH-13-16        | 5         | Beirut          | 6                              | M             | 25                 |
| <b>6</b>  | HH-13-17        | 4         | Beirut          | 5                              | M             | 5                  |
| <b>7</b>  | ZA-13-5         | 3         | Zahle           | 2                              | F             | 10                 |
| <b>8</b>  | ZA-13-6         | 4         | Zahle           | 5                              | M             | 5                  |
| <b>9</b>  | ZA-13-8         | 5         | Zahle           | 2                              | M             | 9                  |
| <b>10</b> | ZA-13-10        | 5         | Zahle           | 5.5                            | M             | 5                  |
| <b>11</b> | ZA-13-11        | 4         | Zahle           | 6                              | M             | 1                  |
| <b>12</b> | ZA-13-13        | 6         | Zahle           | 7                              | F             | 3                  |
| <b>13</b> | AK1             | 4         | Akkar           | 5                              | F             | 9                  |
| <b>14</b> | AK2             | 3         | Akkar           | 4                              | F             | 12                 |
| <b>15</b> | AK5             | 2         | Akkar           | 3                              | F             | 4                  |
| <b>16</b> | 1-HH            | 3         | Beirut          | 4                              | F             | 34                 |
| <b>17</b> | 4-HH            | 5         | Beirut          | 4                              | M             | 4                  |
| <b>18</b> | S13-60-1A       | 3         | Akar            | 3                              | F             | 11                 |
| <b>19</b> | S13-193-1A      | 2         | Akar            | 2.5                            | F             | 74                 |
| <b>20</b> | AK13-13         | 3         | Akar            | 5                              | F             | 42                 |
| <b>21</b> | D02-727A        | 4         | Beirut          | 3                              | M             | 37                 |
| <b>22</b> | D02-727B        | 3         | Beirut          | 4                              | F             | 9                  |
| <b>23</b> | D04-228         | 4         | Beirut          | 3                              | M             | 54                 |
| <b>24</b> | D05-536         | 5         | Beirut          | 1                              | M             | 13                 |
| <b>25</b> | D08-154         | 5         | Beirut          | 4                              | F             | 18                 |
| <b>26</b> | D08-1029        | 5         | Beirut          | 3                              | F             | 83                 |
| <b>27</b> | D10-533         | 6         | Beirut          | 6                              | M             | 23                 |
| <b>28</b> | D93-194         | 4         | Beirut          | 3                              | F             | 60                 |
| <b>29</b> | D93-470         | 6         | Beirut          | 4                              | F             | 53                 |
| <b>30</b> | D94-247         | 4         | Beirut          | 12                             | M             | 16                 |
| <b>31</b> | D94-270         | 6         | Beirut          | 3                              | F             | 46                 |
| <b>32</b> | D95-157         | 4         | Beirut          | 4                              | M             | 46                 |
| <b>33</b> | D95-494         | 5         | Beirut          | 12                             | M             | 5                  |
| <b>34</b> | 10345           | 5         | Aleppo          | 3                              | F             | 11                 |
| <b>35</b> | 11469           | 6         | Aleppo          | 2                              | F             | 65                 |
| <b>36</b> | 28636           | 6         | Saida ( HA)     | 3                              | M             | 4                  |
| <b>37</b> | 52536           | 5         | Saida ( HA)     | 7                              | M             | 23                 |
| <b>38</b> | P11-26000       | 5         | Saida ( HA)     | 9                              | F             | 72                 |
| <b>39</b> | 4HH             | 5         | Beirut          | 4                              | M             | 4                  |
