# Supplementary material for: Detection, molecular typing and phylogenetic analysis of Leishmania isolated from cases of leishmaniasis among Syrian refugees in Lebanon
Source: PubMed Central journal article supplement — Parasite Epidemiol Control. 2016 Feb 27;1(2):159–68. doi: 10.1016/j.parepi.2016.02.002 (PMC5991828; doi:10.1016/j.parepi.2016.02.002), 2016-02-27
Supplement: mmc2.pdf [file mmc2.pdf]

|           | <b>Biotype</b> | <b>Size (bp)</b> | <b>G+C Content (%)</b> | <b>Accession numbers</b> |
|-----------|----------------|------------------|------------------------|--------------------------|
| <b>1</b>  | HH-13-10       | 332              | 49.4                   | KT376735                 |
| <b>2</b>  | HH-13-11       | 289              | 42.56                  | KT376736                 |
| <b>3</b>  | HH-13-12       | 262              | 41.22                  |                          |
| <b>4</b>  | HH-13-14       | 138              | 44.93                  |                          |
| <b>5</b>  | HH-13-16       | 185              | 53.43                  |                          |
| <b>6</b>  | HH-13-17       | 284              | 42.96                  | KT376737                 |
| <b>7</b>  | ZA-13-5        | 91               | 52.75                  |                          |
| <b>8</b>  | ZA-13-6        | 141              | 46.1                   |                          |
| <b>9</b>  | AK5            | 289              | 42.56                  | KT376738                 |
| <b>10</b> | 1-HH           | 278              | 46.04                  | KT376739                 |
| <b>11</b> | 4-HH           | 289              | 41.87                  |                          |
| <b>12</b> | S13-60-1A      | 277              | 42.6                   | KT376740                 |
| <b>13</b> | S13-193-1A     | 287              | 42.16                  | KT376741                 |
| <b>14</b> | AK13-13        | 273              | 42.49                  | KT376742                 |
| <b>15</b> | D02-727A       | 287              | 44.95                  | KT376743                 |
| <b>16</b> | D04-228        | 90               | 52.22                  |                          |
| <b>17</b> | D10-533        | 221              | 49.32                  | KT376744                 |
