# Supplementary material for: Detection, molecular typing and phylogenetic analysis of Leishmania isolated from cases of leishmaniasis among Syrian refugees in Lebanon
Source: PubMed Central journal article supplement — Parasite Epidemiol Control. 2016 Feb 27;1(2):159–68. doi: 10.1016/j.parepi.2016.02.002 (PMC5991828; doi:10.1016/j.parepi.2016.02.002), 2016-02-27
Supplement: mmc3.pdf [file mmc3.pdf]

|           | <b>Biotype</b> | <b>Size (bp)</b> | <b>G/C content</b> | <b>Accession numbers</b> |
|-----------|----------------|------------------|--------------------|--------------------------|
| <b>1</b>  | HH-13-10       | 430              | 42.33              | KT363773                 |
| <b>2</b>  | HH-13-11       | 433              | 46.88              | KT363774                 |
| <b>3</b>  | HH-13-12       | 438              | 44.75              | KT363775                 |
| <b>4</b>  | HH-13-14       | 436              | 43.35              | KT363776                 |
| <b>5</b>  | HH-13-16       | 439              | 41.46              | KT363777                 |
| <b>6</b>  | HH-13-17       | 436              | 47.48              | KT363778                 |
| <b>7</b>  | ZA-13-5        | 435              | 42.3               | KT363779                 |
| <b>8</b>  | ZA-13-6        | 512              | 50.58              | KT363780                 |
| <b>9</b>  | ZA-13-8        | 431              | 49.65              | KT363781                 |
| <b>10</b> | ZA-13-10       | 433              | 42.49              | KT363782                 |
| <b>11</b> | ZA-13-11       | 441              | 43.54              | KT363783                 |
| <b>12</b> | ZA-13-13       | 441              | 44.67              | KT363784                 |
| <b>13</b> | AK1            | 428              | 40.89              | KT363785                 |
| <b>14</b> | AK2            | 410              | 42.44              | KT363786                 |
| <b>15</b> | AK5            | 439              | 42.82              | KT363787                 |
| <b>16</b> | 1-HH           | 435              | 43.45              | KT363788                 |
| <b>17</b> | 4-HH           | 436              | 42.89              | KT363789                 |
| <b>18</b> | S13-60-1A      | 427              | 38.17              | KT363790                 |
| <b>19</b> | S13-193-1A     | 439              | 42.14              | KT363791                 |
| <b>20</b> | AK13-13        | 254              | 48.43              | KT363792                 |
| <b>21</b> | D02-727A       | 439              | 39.18              | KT363793                 |
| <b>22</b> | D02-727B       | 434              | 42.86              | KT363794                 |
| <b>23</b> | D04-228        | 432              | 43.29              | KT363795                 |
| <b>24</b> | D05-536        | 435              | 43.45              | KT363796                 |
| <b>25</b> | D08-154        | 440              | 43.86              | KT363797                 |
| <b>26</b> | D08-1029       | 422              | 42.65              | KT363798                 |
| <b>27</b> | D10-533        | 436              | 42.66              | KT363799                 |
